# Supplementary material for: Targeting the Regulatory Subunit R2Alpha of Protein Kinase A in Human Glioblastoma through shRNA-Expressing Lentiviral Vectors
Source: MDPI journal article supplement (doi:10.3390/v13071361), 2021-07-13

Zorzan et al.

Targeting the regulatory subunit R2Alpha of protein kinase A in human glioblastoma through shRNA-expressing lentiviral vectors

**Supplementary Figure S1:** PKA R2A silencing in the same experiment shown in Fig. 3 (main text). U87 cells, 6 days post-transduction. The percentage of reduction relative to mock is shown above each lane.

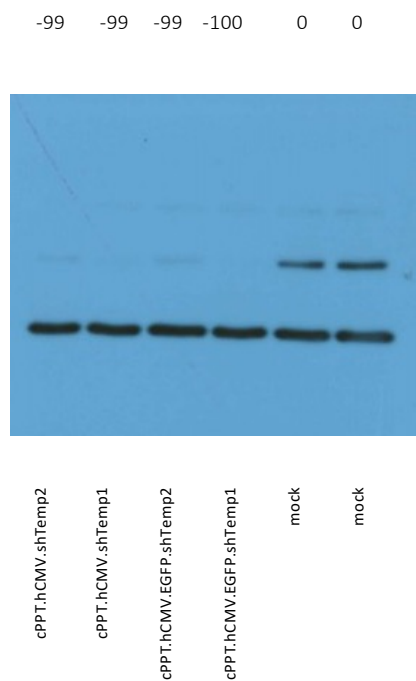

**Supplementary Figure S2:** annexin V-propidium iodide mortality assay 13 days after transduction: no significant change in mortality was detected in each condition.

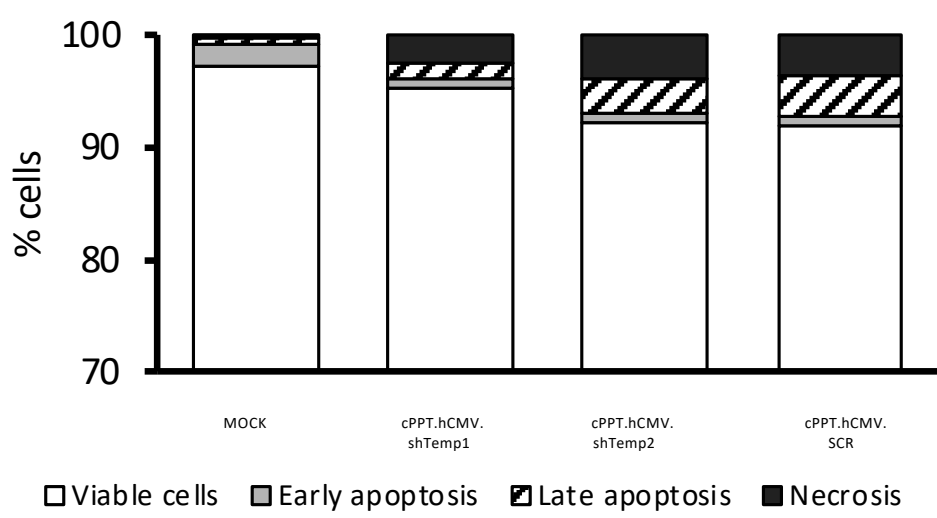

**Supplementary Figure S3:** Correlation between PRKAR2A expression and the expression of genes GOLGA1 (A) and GOLGA4 (B) as Golgi markers, AKAP12 (C) as a PKAR2A docking protein, and NCAM1 (D) as a gene highly expressed in glioblastoma.

Data on glioblastoma (n=172) were retrieved from TCGA and analyzed with Xena browser. Significant positive correlations were found for GOLGA1, Pearson's  $Rho=0.2054$ ,  $p=0.0068$ , GOLGA4, Pearson's  $Rho=0.3178$ ,  $p=0.00002$  and AKAP12, Pearson's  $Rho=0.2222$ ,  $p=0.0033$ , while a barely significant positive correlation was found for NCAM1, Pearson's  $Rho=0.1567$ ,  $p=0.0401$ .

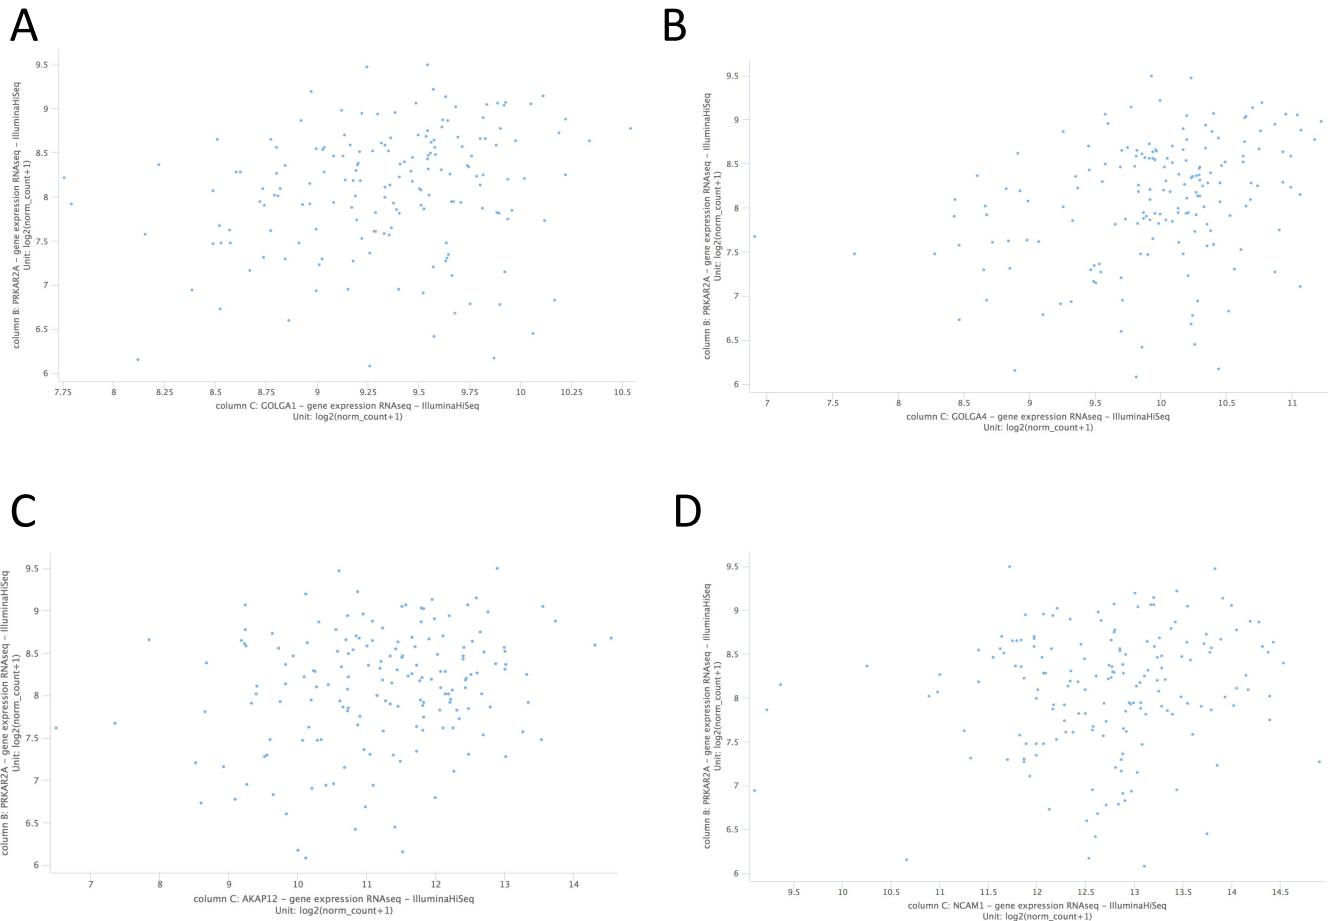

**Supplementary Figure S4:** Correlation between PRKAR2A expression and the expression of genes VIM (A) as a stem cell marker, GFAP (B) as a marker of differentiated cells, MKI67 (C) as a proliferation marker, BCL2 (D) as an inhibitor of pro-apoptotic genes.

Data on glioblastoma (n=172) were retrieved from TCGA and analyzed with Xena browser. No significant correlation was found for VIM and GFAP, while significant positive correlations were found for MKI67, Pearson's  $Rho=0.2343$ ,  $p=0.0012$ , and BCL2, Pearson's  $Rho=0.1962$ ,  $p=0.0099$ .

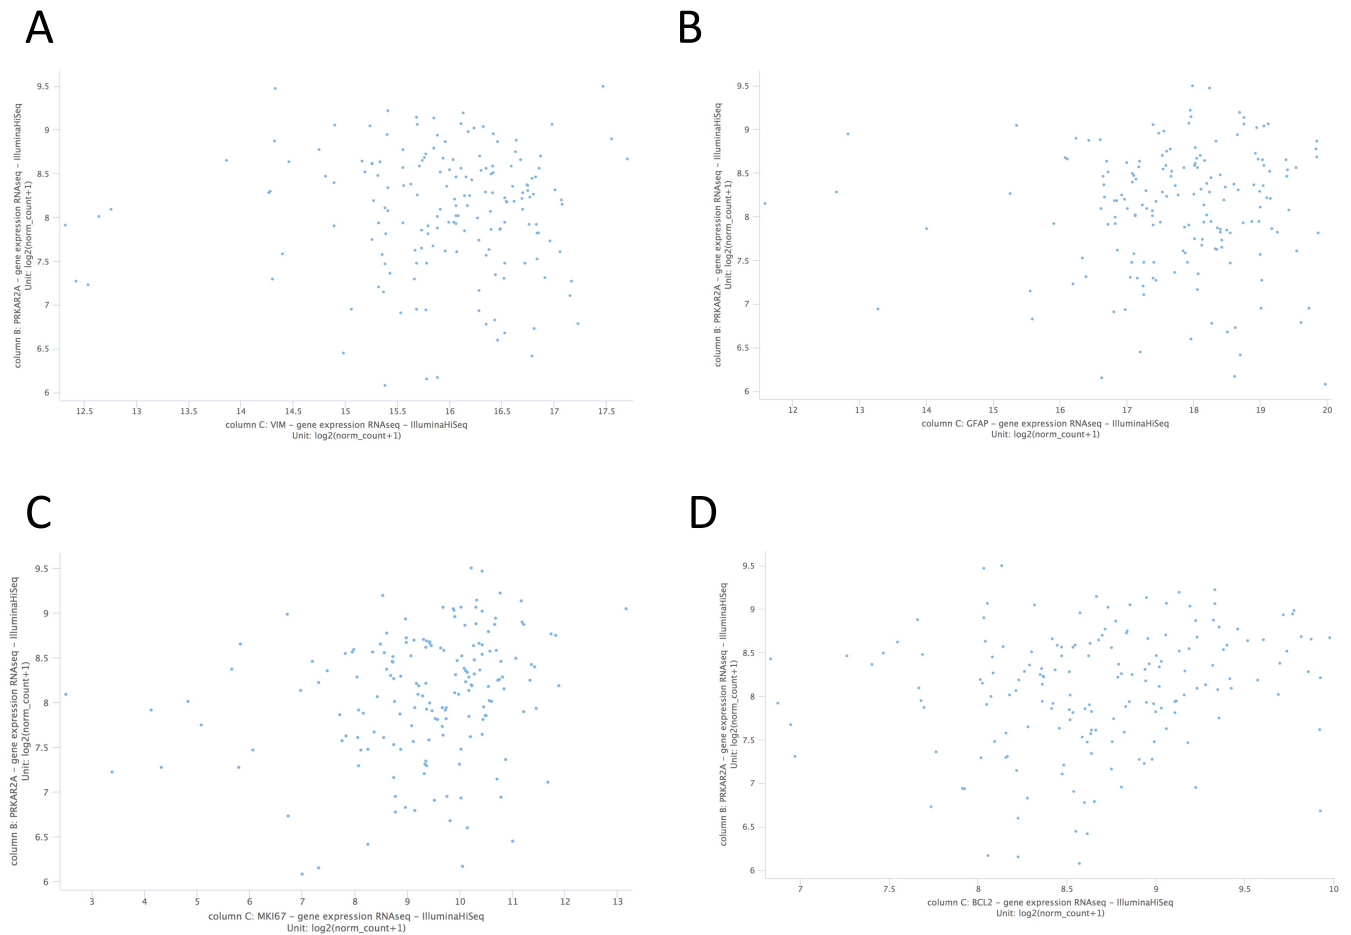

**Supplementary Figure S5: Correlation between PRKAR2A expression and the expression of genes PRKAR1A (A), PRKAR1B (B), PRKAR2B (C), PRKACA (D).**

Data on glioblastoma (n=172) were retrieved from TCGA and analyzed with Xena browser. One slightly positive, yet significant correlation was found, between PRKAR2A and PRKAR1A: Pearson's Rho=0.1720, p=0.024.

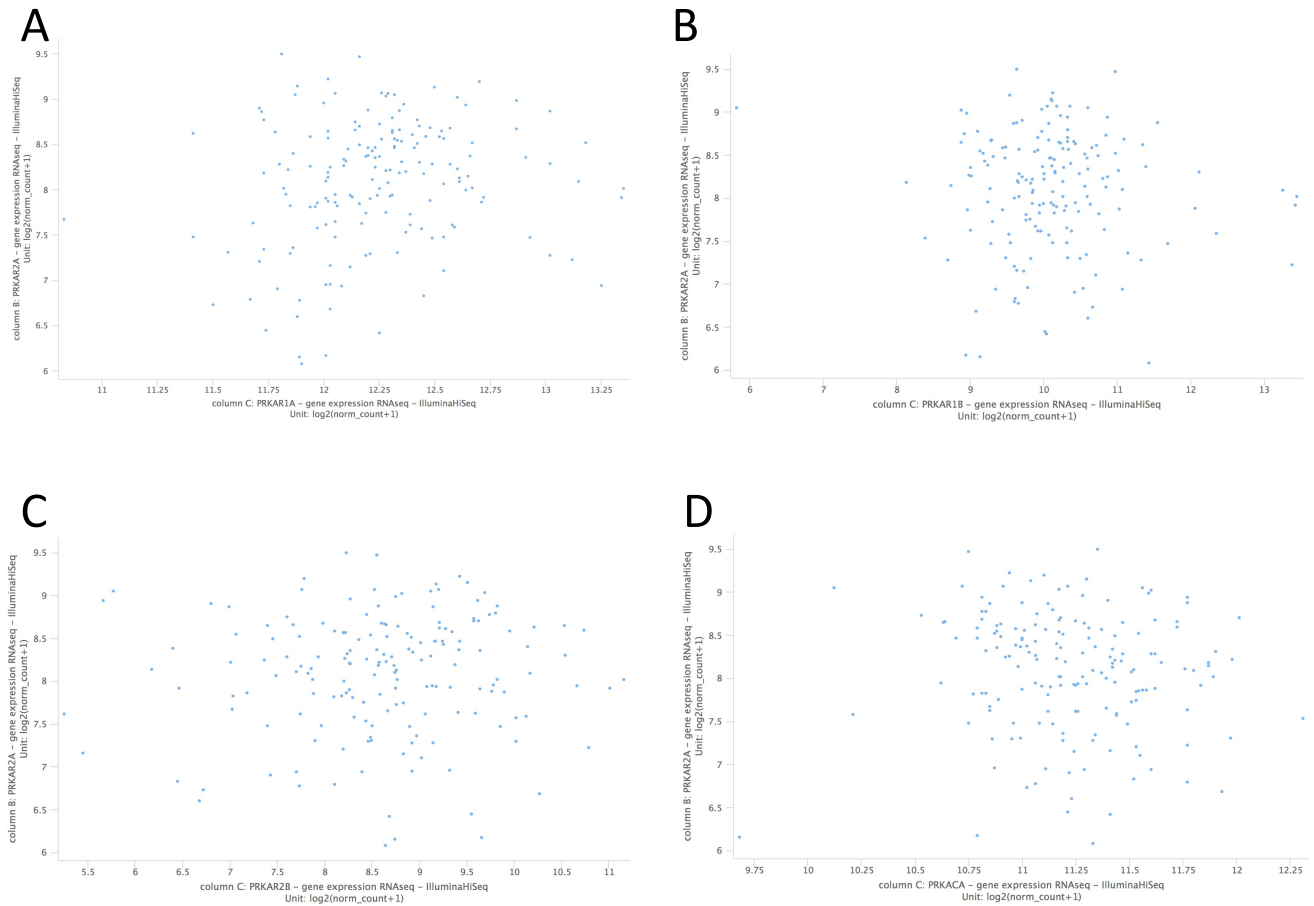

# B

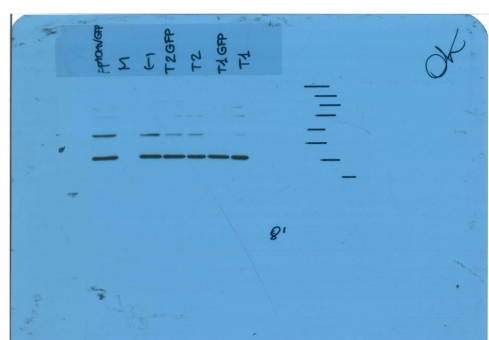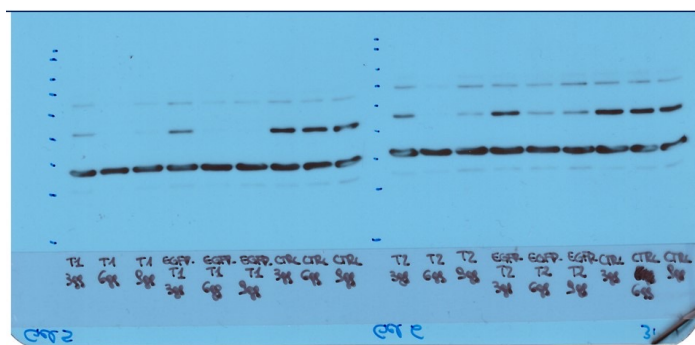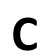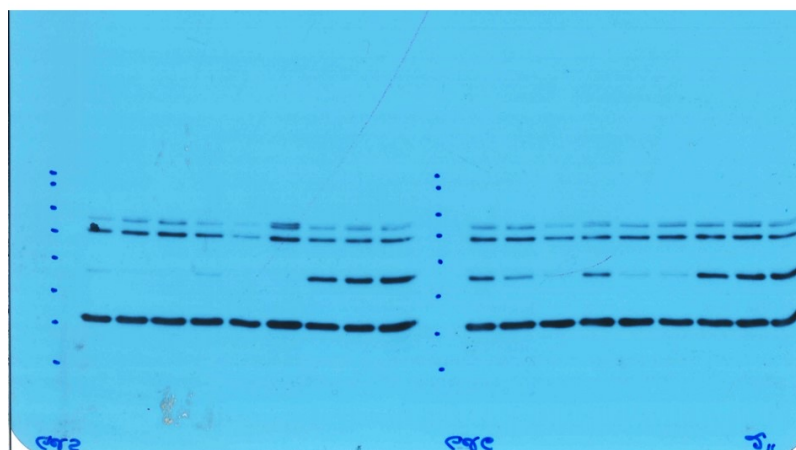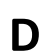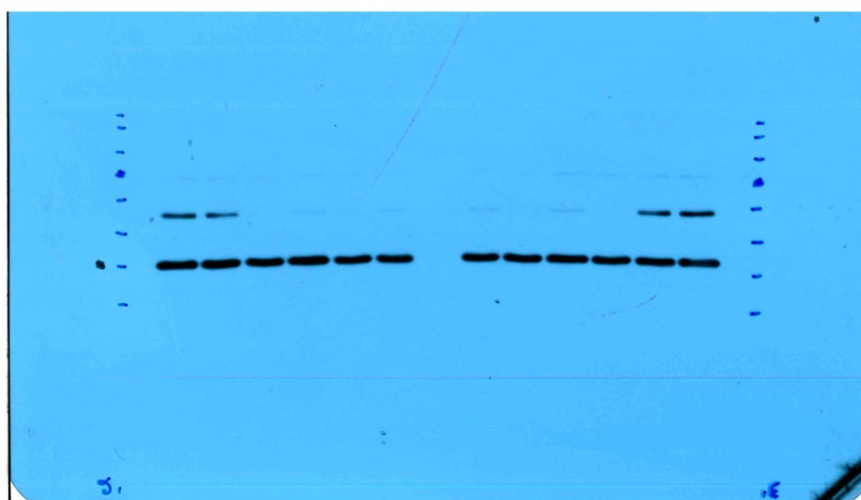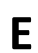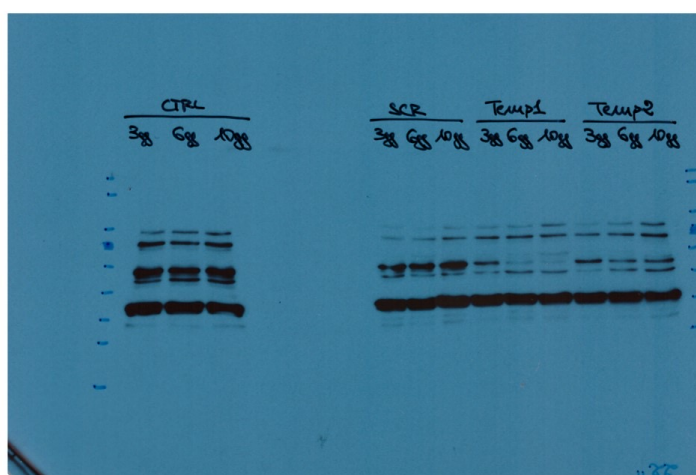

ORIGINAL BLOT FIGURE 3

A

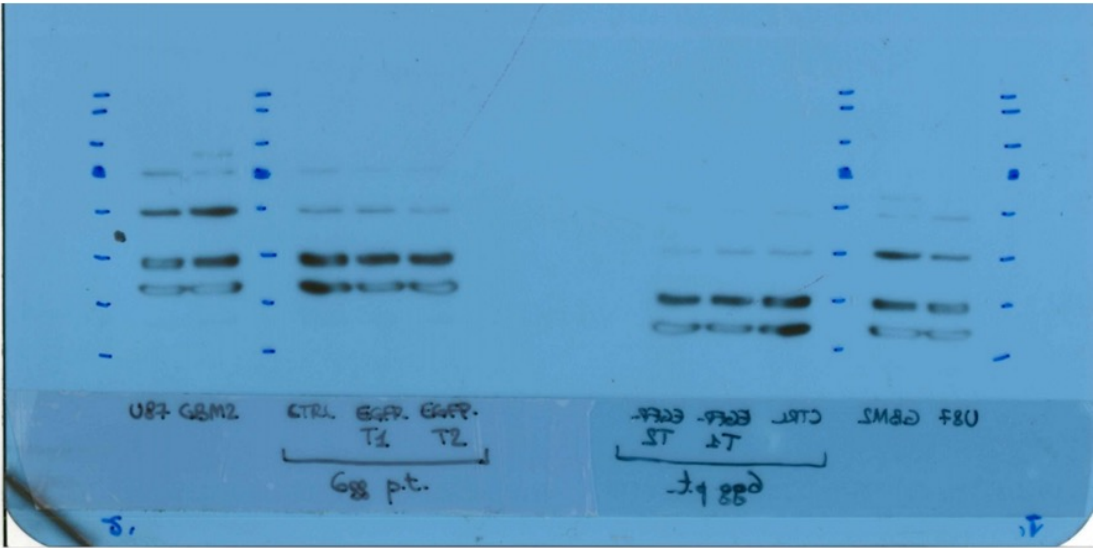

B

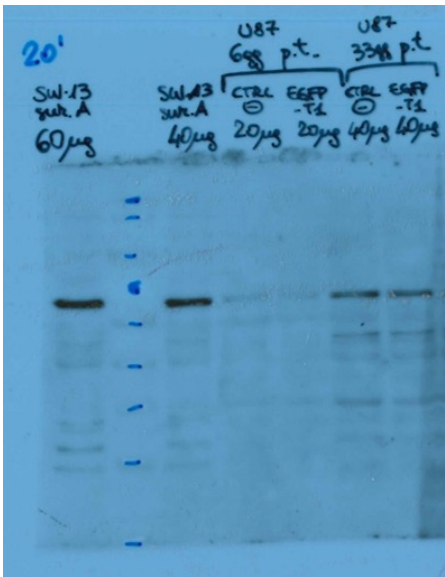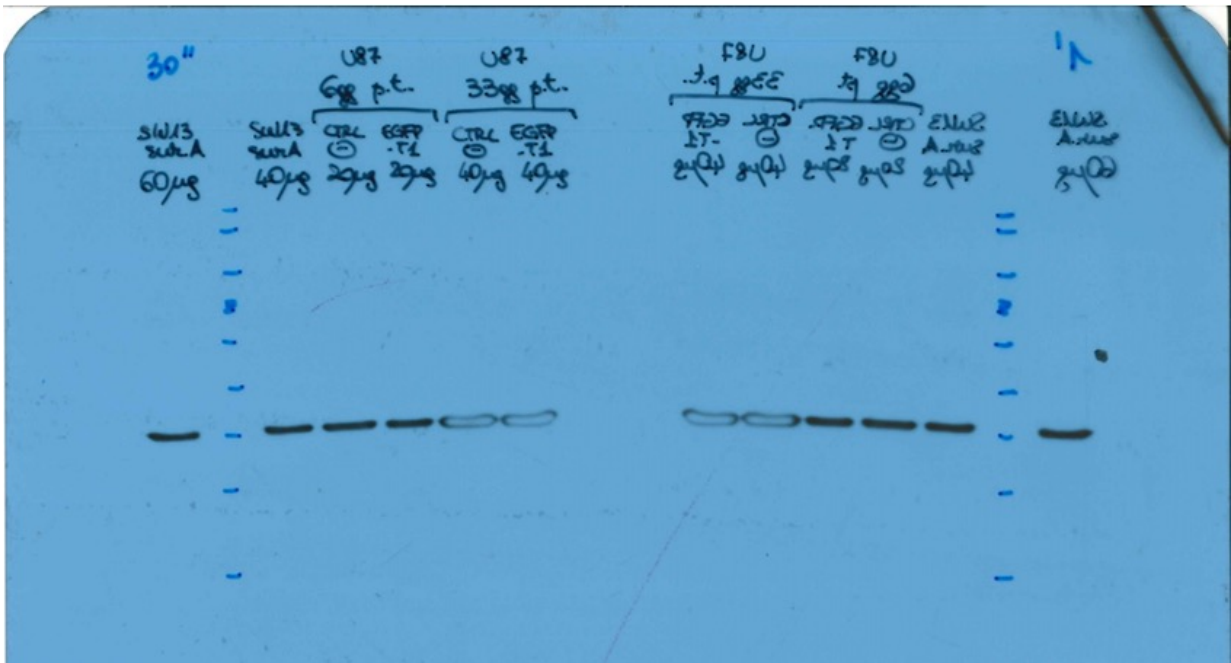



ORIGINAL BLOT FIG. 5

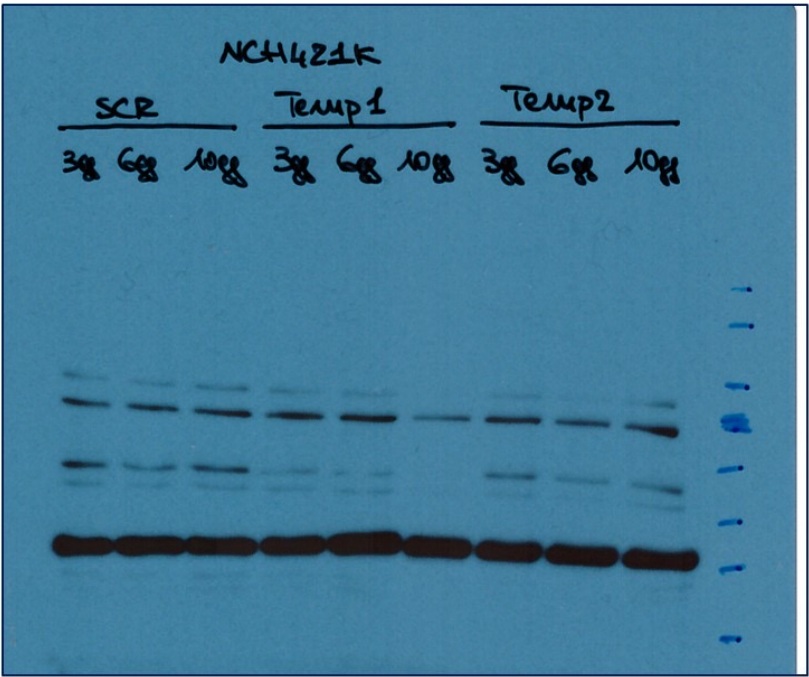

ORIGINAL BLOT FIG. 6

PKA R2A

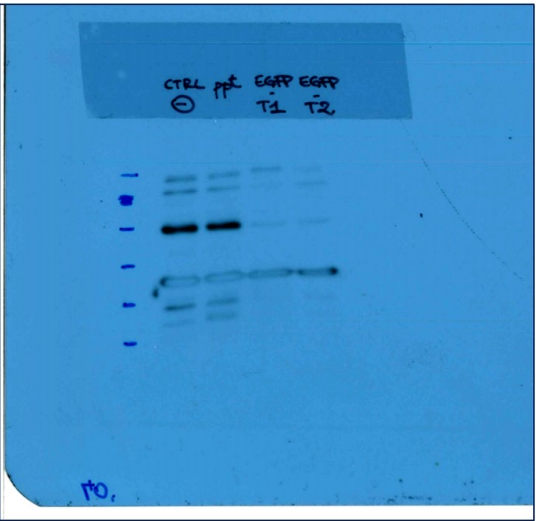

GAPDH

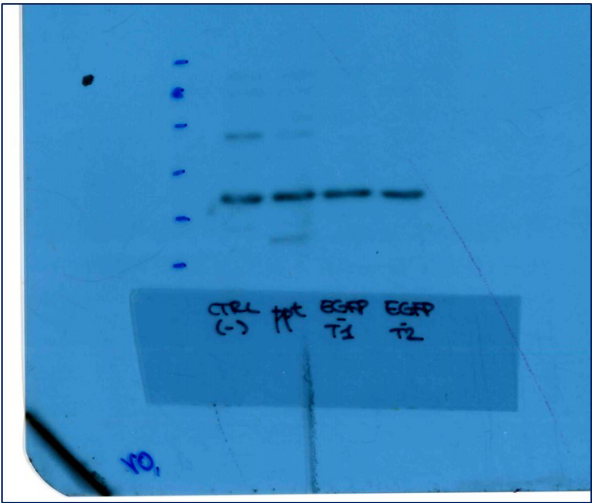

Supplement: s1 [file s1]
